# Supplementary material
Source: PubMed Central journal article supplement (PMC6233772)
Supplement: jamaoncol-4-1367-s001.pdf [file jamaoncol-4-1367-s001.pdf]

## Supplementary Online Content

Jerusalem G, de Boer RH, Hurvitz S, et al. Everolimus Plus Exemestane vs Everolimus or Capecitabine Monotherapy for Estrogen Receptor–Positive, HER2-Negative Advanced Breast Cancer (BOLERO-6): A Phase 2 Randomized Clinical Trial. *JAMA Oncology*. Published online June 3, 2018. doi:10.1001/jamaoncol.2018.2262

**eMethods.** Study Design and Participants, Procedures, Sample Size Calculation, Interim Analysis

**eTable 1.** BOLERO-6 Recruitment Sites

**eTable 2.** Baseline Patient Demographics and Disease Characteristics

**eTable 3.** First-Line Antineoplastic Therapies Initiated Following Treatment Discontinuation

**eTable 4.** Efficacy Analysis, Per Local Investigator Review (Full Analysis Set)

**eTable 5.** Analysis of OS, Per Local Investigator Review (Full Analysis Set)

**eTable 6.** Dose Interruptions and Reductions

**eTable 7.** Serious Adverse Events ( $\geq 1.5\%$  Incidence in Any Arm), Regardless of Causality

**eTable 8.** Adverse Events Leading to Treatment Discontinuation ( $\geq 1.5\%$  Incidence in Any Arm), Regardless of Causality

**eTable 9.** Summary of Deaths

**eReferences.**

This supplementary material has been provided by the authors to give readers additional information about their work.

## **eMethods**

### **Study Design and Participants**

Everolimus was provided by Novartis as 5 mg tablets. Exemestane and capecitabine were supplied locally (or by Novartis if not commercially available) as 25 mg and 1250 mg/m<sup>2</sup> tablets, respectively.

Additional requirements were Eastern Cooperative Oncology Group (ECOG) performance status 0-2, adequate bone marrow, coagulation, liver and renal function, fasting serum cholesterol  $\leq 300$  mg/dL, and fasting triglycerides  $\leq 2.5 \times$  the upper limit of normal. Additional exclusion criteria included: prior treatment with strong inhibitors or inducers of isoenzyme cytochrome P450-3A for  $\geq 7$  days within 2 weeks of randomization, or treatment with sorivudine or any of its chemically related analogues within 4 weeks of randomization; another malignancy within 5 years of randomization (except adequately treated in situ carcinoma of the cervix uteri, basal or squamous cell carcinoma, nonmelanomatous skin cancer, or a history of stage IA melanoma that has been cured), or current or historical central nervous system metastases; radiotherapy within 4 weeks of randomization, unless it was localized palliative radiotherapy, or radiotherapy for lytic lesions at risk of fracture completed  $\geq 2$  weeks before randomization; and hormone replacement therapy that was not discontinued before randomization, a known history of human immunodeficiency virus seropositivity, a severe and/or uncontrolled medical condition, bilateral diffuse lymphangitis, or active bleeding diathesis.

### **Procedures**

Dose adjustments were permitted if a patient could not tolerate the scheduled dose. Up to two levels of everolimus dose adjustment from the starting dose (10 mg daily) were permitted in the event of severe or intolerable adverse reactions: 5 mg daily; 5 mg every other day. Capecitabine dose reductions were allowed in specific circumstances (see protocol). Interruption of everolimus or capecitabine monotherapy for  $\geq 4$  weeks resulted in permanent discontinuation of the study drug. Interruption of everolimus or exemestane for  $\geq 4$  weeks in patients randomized to receive everolimus plus exemestane resulted in permanent discontinuation of the drug, although monotherapy with the combination partner could continue until disease progression, unacceptable toxicity, or withdrawal of consent.

Interactive Response Technology (IRT) was used to randomize eligible patients in a 1:1:1 ratio to one of the three treatment arms, with randomization stratified by the presence or absence of visceral disease. A subject randomization list, produced by Novartis, was provided by the IRT provider using a validated system that automated the random assignment of subject numbers to randomization numbers. These randomization numbers were linked to the different treatment arms, which in turn were linked to medication numbers. A separate

medication list was produced by, or under the responsibility of, Novartis Drug Supply Management, using a validated system that automated the random assignment of medication numbers to packs containing the study treatment. Randomization was performed with a block size of 6 to ensure 1:1:1 randomization within the strata. Each subject in the study was uniquely identified by a 9-digit subject number, which was a combination of her 4-digit center number and 5-digit subject number. The center number was assigned by Novartis to the investigative site. Upon signing the informed consent form, the subject was assigned a subject number by the investigator. At each site, the first subject was assigned subject number 1, and subsequent subjects were assigned consecutive numbers. The investigator or his/her staff contacted the IRT and provided the requested identifying information for the subject to register them into the IRT. A pre-randomization form was completed by each site and sent to Novartis for approval prior to randomizing subjects via IRT. Once assigned, the subject numbers for subjects were not reused. If the subject failed to be randomized for any reason, the IRT was required to be notified within 2 days that the subject was not randomized. The reason for not being randomized was entered on the Screening Log, and the Demography Case Report Form was also completed.

### **Sample Size Calculation**

The primary objective was to estimate the HR of PFS for everolimus plus exemestane versus everolimus alone with approximately 150 PFS events. For this number of PFS events, the precision of HR estimation is illustrated by tabulating the approximate 90% CIs (Jennison and Turnbull 1999) for different values of hazard ratio from 0.55 to 0.75 by considering a relative precision of  $\pm 24\%$  (see below).

| <b>Estimated HR</b> | <b>Assuming 150 observed PFS events</b> |                                         |
|---------------------|-----------------------------------------|-----------------------------------------|
|                     | <b>Lower bound of<br/>90% CI for HR</b> | <b>Upper bound of<br/>90% CI for HR</b> |
| 0.55                | 0.420                                   | 0.719                                   |
| 0.60                | 0.459                                   | 0.785                                   |
| 0.65                | 0.497                                   | 0.850                                   |
| 0.70                | 0.535                                   | 0.916                                   |
| 0.75                | 0.573                                   | 0.981                                   |

A total of 300 patients were planned for recruitment at a uniform rate over an 18-month enrollment period, and randomized with equal allocation to one of the three treatment arms. Assuming median PFS times of 7 months

in the everolimus plus exemestane arm (Baselga et al 2012), 4 months in the everolimus alone arm (Ellard et al 2009), and 6 months in the capecitabine arm (O'Shaughnessy et al 2012, Stocker et al 2007, Harbeck et al 2017, Kaufmann et al 2010, Robert et al 2011), the expected time to observe 150 PFS events in each of the two pairwise treatment comparisons was approximately 28 months after randomization of the first study patient (assuming approximately 10% of the study population would be lost to follow-up or would withdraw consent).

### **Interim Analysis**

A planned interim analysis was performed after 75 PFS events had been observed per local assessment across the everolimus alone and everolimus plus exemestane arms, with the intent of allowing early termination of the everolimus alone arm in the event of far inferior efficacy versus the everolimus plus exemestane arm. A general guidance was to stop the everolimus alone arm if the observed HR was  $<0.20$  (i.e., the everolimus alone arm was far inferior versus the everolimus plus exemestane arm). The proposed decision guidance yielded high probability to stop the control arm if the combination arm was highly superior ( $HR \leq 0.1$ ), while keeping the probability low if the superiority was not so extreme ( $HR \geq 0.3$ ). This interim analysis, included in amendment 2 of the protocol (Section 9.8.1), was endorsed by the DMC and SSC. Based on results of the interim analysis, the DMC recommendation was to continue the study as planned.

## eTables

**eTable 1. BOLERO-6 Recruitment Sites**

| Center country | Investigator name          | Randomized |
|----------------|----------------------------|------------|
| Russia         | Prof. Lyudmila Manzyuk     | 17         |
| United States  | Dr Denise Yardley          | 12         |
| United States  | Dr Sibel Blau              | 12         |
| Belgium        | Prof. Guy Jerusalem        | 11         |
| Turkey         | Prof. Dr Mustafa Ozguroglu | 11         |
| Denmark        | Dr Marianne Ewertz         | 9          |
| Brazil         | Dr Rodrigo Villarroel      | 8          |
| Hungary        | Dr Eva Padi                | 8          |
| Malaysia       | Dr Adlinda Alip            | 8          |
| Brazil         | Dr Roberto Hegg            | 7          |
| Denmark        | Dr Erik Jakobsen           | 7          |
| Spain          | Dr Antonio Gonzalez Martin | 7          |
| Lebanon        | Dr Fadi Farhat             | 7          |
| Russia         | Dr Ekaterina Solovieva     | 7          |
| Australia      | Dr Yoland Antill           | 6          |
| Denmark        | Dr Peter Michael Vestlev   | 6          |
| Argentina      | Dr Guillermo Lerzo         | 5          |
| Australia      | Dr Richard de Boer         | 5          |
| Spain          | Dr Javier Cortes Castan    | 5          |
| Spain          | Dr Jose Angel Garcia Saenz | 5          |
| Lebanon        | Dr Marwan Ghosn            | 5          |
| Peru           | Dr Hugo Fuentes            | 5          |
| United States  | Dr Timothy Panella         | 5          |
| Argentina      | Dr Luis Fein               | 4          |
| Australia      | Dr Gavin Marx              | 4          |
| India          | Dr Sudeep Gupta            | 4          |

|                |                            |   |
|----------------|----------------------------|---|
| Ireland        | Dr Maccon Keane            | 4 |
| Sweden         | Dr Henrik Lindman          | 4 |
| United States  | Dr Sara Hurvitz            | 4 |
| United States  | Dr Patrick Dillon          | 4 |
| United States  | Dr Robert Weaver           | 4 |
| Argentina      | Dr Nora Mohr               | 3 |
| Brazil         | Dr Carlos Henrique Barrios | 3 |
| Brazil         | Dr Andrea Juliana Gomes    | 3 |
| Brazil         | Dr Jorge Henrique Leal     | 3 |
| Denmark        | Dr Sven Langkjer           | 3 |
| United Kingdom | Dr Grainne Dunn            | 3 |
| India          | Dr Tapti Sen               | 3 |
| Ireland        | Dr Linda Coate             | 3 |
| Lebanon        | Dr Nagi El-Saghir          | 3 |
| Malaysia       | Dr Flora Li Tze Chong      | 3 |
| Sweden         | Dr Ulrik Narbe             | 3 |
| Turkey         | Dr Binnaz Demirkan         | 3 |
| United States  | Dr Lowell Hart             | 3 |
| Argentina      | Dr Ruben Kowalyszyn        | 2 |
| Argentina      | Dra. Adriana Borello       | 2 |
| Spain          | Dr Manuel Borrego          | 2 |
| United Kingdom | Dr Stephen Chan            | 2 |
| Hungary        | Dr Laszlo Landherr         | 2 |
| India          | Dr Senthil Rajappa         | 2 |
| Ireland        | Dr Janice Walshe           | 2 |
| Lebanon        | Dr Ghazi Nsouli            | 2 |
| Peru           | Dr Hernan Morón            | 2 |
| Russia         | Dr Svetlana Protsenko      | 2 |
| Sweden         | Dr Thomas Hatschek         | 2 |

|                |                                |   |
|----------------|--------------------------------|---|
| Sweden         | Dr Helena Granstam Bjorneklett | 2 |
| Sweden         | Dr Maria Ekholm                | 2 |
| Thailand       | Dr Srila Samphao               | 2 |
| Turkey         | Prof. Dr Semra Paydas          | 2 |
| United States  | Dr Stanley Waintraub           | 2 |
| United States  | Dr Rajesh Belani               | 2 |
| United States  | Dr Samhita Chakraborty         | 2 |
| United States  | Dr Kevin Weibel                | 2 |
| United States  | Dr Robyn Young                 | 2 |
| United States  | Dr Brooke Daniel               | 2 |
| Australia      | Prof. Michael Friedlander      | 1 |
| Denmark        | Dr Bent Ejlersen               | 1 |
| Denmark        | Dr Sami Al-Rawi                | 1 |
| United Kingdom | Dr Alison Humphreys            | 1 |
| Hungary        | Dr Zsolt Horvath               | 1 |
| India          | Dr Minish Jain                 | 1 |
| Lebanon        | Dr Fady Nasr                   | 1 |
| Peru           | Dr Alfredo Aguilar             | 1 |
| Peru           | Dra. Milagros Cavero           | 1 |
| Sweden         | Dr Antonis Valachis            | 1 |
| Thailand       | Dr Piti Pornprasertthasuk      | 1 |
| Thailand       | Dr Damnern Vachirodom          | 1 |
| United States  | Dr Corrine Zarwan              | 1 |
| United States  | Dr Karen Hunt                  | 1 |
| United States  | Dr Gerardo Capo                | 1 |
| United States  | Dr Clyde Jones                 | 1 |
| United States  | Dr Patrick Ward                | 1 |
| United States  | Dr Revati Rao                  | 1 |

**eTable 2. Baseline Patient Demographics and Disease Characteristics**

| <b>Characteristic</b>                    | <b>Everolimus + Exemestane<br/>(n = 104)</b> | <b>Everolimus<br/>(n = 103)</b> | <b>Capecitabine<br/>(n = 102)</b> |
|------------------------------------------|----------------------------------------------|---------------------------------|-----------------------------------|
| <b>Age, years</b>                        |                                              |                                 |                                   |
| Median (range)                           | 61 (32-86)                                   | 61 (38-88)                      | 60 (35-84)                        |
| <65                                      | 65 (63)                                      | 64 (62)                         | 69 (68)                           |
| ≥65                                      | 39 (38)                                      | 39 (38)                         | 33 (32)                           |
| <b>Race, n (%)</b>                       |                                              |                                 |                                   |
| Caucasian                                | 78 (75)                                      | 85 (83)                         | 91 (89)                           |
| Asian                                    | 11 (11)                                      | 8 (8)                           | 8 (8)                             |
| Native American                          | 3 (3)                                        | 2 (2)                           | 0                                 |
| Black                                    | 1 (1)                                        | 2 (2)                           | 0                                 |
| Other                                    | 11 (11)                                      | 6 (6)                           | 3 (3)                             |
| <b>ECOG performance status, n (%)</b>    |                                              |                                 |                                   |
| 0                                        | 54 (52)                                      | 48 (47)                         | 57 (56)                           |
| 1                                        | 42 (40)                                      | 50 (49)                         | 39 (38)                           |
| 2                                        | 5 (5)                                        | 3 (3)                           | 4 (4)                             |
| Missing                                  | 3 (3)                                        | 2 (2)                           | 2 (2)                             |
| <b>Metastatic site of cancer, n (%)</b>  |                                              |                                 |                                   |
| CNS                                      | 0                                            | 1 (1)                           | 1 (1)                             |
| Visceral <sup>a</sup> (excluding CNS)    | 69 (66)                                      | 66 (64)                         | 63 (62)                           |
| Lung                                     | 32 (31)                                      | 30 (29)                         | 30 (29)                           |
| Liver                                    | 44 (42)                                      | 43 (42)                         | 42 (41)                           |
| Liver and lung                           | 11 (11)                                      | 12 (12)                         | 12 (12)                           |
| Other visceral                           | 12 (12)                                      | 14 (14)                         | 12 (12)                           |
| Bone                                     | 88 (85)                                      | 79 (77)                         | 85 (83)                           |
| Bone-only                                | 13 (13)                                      | 16 (16)                         | 24 (24)                           |
| Other                                    | 67 (64)                                      | 61 (59)                         | 60 (59)                           |
| <b>Time since most recent recurrence</b> |                                              |                                 |                                   |



|                                                     |           |           |           |
|-----------------------------------------------------|-----------|-----------|-----------|
| <b>or metastasis, months</b>                        | 96 (92)   | 97 (94)   | 97 (95)   |
| <3                                                  | 7 (7)     | 3 (3)     | 5 (5)     |
| 3-<6                                                | 1 (1)     | 3 (3)     | 0         |
| ≥6                                                  |           |           |           |
| <b>Number of metastatic sites, n (%)</b>            |           |           |           |
| 1-2                                                 | 52 (50)   | 56 (54)   | 57 (56)   |
| ≥3                                                  | 52 (50)   | 47 (46)   | 45 (44)   |
| <b>Type of lesion</b>                               |           |           |           |
| Target-only                                         | 3 (3)     | 10 (10)   | 7 (7)     |
| Nontarget only                                      | 12 (12)   | 5 (5)     | 9 (9)     |
| Bone-only                                           | 18 (17)   | 17 (17)   | 27 (26)   |
| Target and nontarget                                | 71 (68)   | 71 (69)   | 59 (58)   |
| <b>Any prior antineoplastic therapy<sup>b</sup></b> | 104 (100) | 103 (100) | 102 (100) |
| <b>Any prior radiotherapy</b>                       | 79 (76)   | 76 (74)   | 78 (76)   |
| <b>Any prior surgery</b>                            | 95 (91)   | 96 (93)   | 91 (89)   |
| <b>Prior NSAI</b>                                   | 103 (99)  | 103 (100) | 102 (100) |
| <b>Prior chemotherapy</b>                           |           |           |           |
| Adjuvant/neoadjuvant only                           | 47 (45)   | 43 (42)   | 55 (54)   |
| Metastatic only                                     | 16 (15)   | 20 (19)   | 16 (16)   |
| Both                                                | 8 (8)     | 15 (15)   | 5 (5)     |
| <b>Other prior therapy</b>                          |           |           |           |
| Fulvestrant                                         | 13 (13)   | 13 (13)   | 9 (9)     |
| Targeted therapy                                    | 3 (3)     | 7 (7)     | 9 (9)     |
| Other                                               | 4 (4)     | 5 (5)     | 3 (3)     |

Abbreviations: CNS, central nervous system; ECOG, Eastern Cooperative Oncology Group; NSAI, nonsteroidal aromatase inhibitor.

<sup>a</sup> Lung, liver, heart, ovary, spleen, kidney, adrenal gland, malignant pleural, pericardial effusion, or malignant ascites, as collected on the Case Report Form.

<sup>b</sup> Any prior antineoplastic therapy was recorded in all settings.

**eTable 3. First-Line Antineoplastic Therapies Initiated Following Treatment Discontinuation**

| No. (%)                                                    | Everolimus +<br>Exemestane<br>(n = 104) | Everolimus<br>(n = 103) | Capecitabine<br>(n = 102) |
|------------------------------------------------------------|-----------------------------------------|-------------------------|---------------------------|
| <b>Overall</b>                                             | <b>81 (78)</b>                          | <b>83 (81)</b>          | <b>81 (79)</b>            |
| Capecitabine                                               | 20 (19)                                 | 20 (19)                 | 8 (8)                     |
| Exemestane                                                 | 5 (5)                                   | 10 (10)                 | 10 (10)                   |
| Fulvestrant                                                | 5 (5)                                   | 14 (14)                 | 10 (10)                   |
| Paclitaxel                                                 | 5 (5)                                   | 2 (2)                   | 2 (2)                     |
| Tamoxifen                                                  | 5 (5)                                   | 2 (2)                   | 3 (3)                     |
| Anastrozole                                                | 4 (4)                                   | 1 (1)                   | 0                         |
| Bevacizumab + paclitaxel                                   | 3 (3)                                   | 1 (1)                   | 0                         |
| Paclitaxel albumin                                         | 3 (3)                                   | 2 (2)                   | 2 (2)                     |
| Doxorubicin                                                | 2 (2)                                   | 0                       | 0                         |
| Fulvestrant + investigational drug                         | 2 (2)                                   | 1 (1)                   | 2 (2)                     |
| Bevacizumab + capecitabine                                 | 1 (1)                                   | 0                       | 0                         |
| Bevacizumab + capecitabine + cyclophosphamide + exemestane | 1 (1)                                   | 0                       | 0                         |
| Capecitabine + docetaxel                                   | 1 (1)                                   | 0                       | 0                         |

|                                                   |       |       |       |
|---------------------------------------------------|-------|-------|-------|
| Capecitabine + eribulin mesilate + tamoxifen      | 1 (1) | 0     | 0     |
| Capecitabine + gemcitabine hydrochloride non-drug | 1 (1) | 0     | 0     |
| Capecitabine + zoledronic acid                    | 1 (1) | 0     | 0     |
| Carboplatin                                       | 1 (1) | 0     | 0     |
| Cisplatin + gemcitabine                           | 1 (1) | 0     | 0     |
| Cyclophosphamide + docetaxel                      | 1 (1) | 0     | 1 (1) |
| Cyclophosphamide + doxorubicin                    | 1 (1) | 0     | 0     |
| Cyclophosphamide + doxorubicin + fluorouracil     | 1 (1) | 0     | 0     |
| Cyclophosphamide + epirubicin                     | 1 (1) | 2 (2) | 0     |
| Cyclophosphamide + fluorouracil                   | 1 (1) | 0     | 0     |
| Cyclophosphamide + fluorouracil + methotrexate    | 1 (1) | 0     | 0     |
| Denosumab + fulvestrant                           | 1 (1) | 0     | 1 (1) |
| Docetaxel                                         | 1 (1) | 1 (1) | 2 (2) |
| Docetaxel + vinorelbine tartrate                  | 1 (1) | 1 (1) | 0     |
| Eribulin                                          | 1 (1) | 1 (1) | 1 (1) |
| Exemestane + fulvestrant                          | 1 (1) | 1 (1) | 0     |
| Exemestane + non-drug: radiotherapy               | 1 (1) | 0     | 0     |
| Fulvestrant + taselisib                           | 1 (1) | 0     | 0     |
| Investigational drug + non-drug: radiotherapy     | 1 (1) | 0     | 0     |

|                                                                |       |       |       |
|----------------------------------------------------------------|-------|-------|-------|
| Letrozole + palbociclib                                        | 1 (1) | 0     | 0     |
| Non-drug: procedure surgical neoplasm                          | 1 (1) | 0     | 0     |
| Tamoxifen citrate                                              | 1 (1) | 0     | 0     |
| Trastuzumab + vinorelbine tartrate                             | 1 (1) | 0     | 0     |
| Vinorelbine tartrate                                           | 1 (1) | 0     | 2 (2) |
| Anastrozole + bondronat                                        | 0     | 1 (1) | 0     |
| Anastrozole + everolimus                                       | 0     | 1 (1) | 0     |
| Anastrozole + zoledronic acid                                  | 0     | 0     | 1 (1) |
| Bevacizumab + paclitaxel albumin                               | 0     | 0     | 1 (1) |
| Capecitabine + exemestane                                      | 0     | 1 (1) | 0     |
| Capecitabine + fulvestrant                                     | 0     | 0     | 1 (1) |
| Capecitabine + non-drug: radiotherapy                          | 0     | 0     | 1 (1) |
| Capecitabine + ruxolitinib                                     | 0     | 1 (1) | 0     |
| Capecitabine + vinorelbine                                     | 0     | 1 (1) | 0     |
| Capecitabine + vinorelbine tartrate                            | 0     | 3 (3) | 0     |
| Carboplatin + gemcitabine                                      | 0     | 1 (1) | 1 (1) |
| Carboplatin + paclitaxel                                       | 0     | 0     | 2 (2) |
| Cyclophosphamide + epirubicin + fluorouracil                   | 0     | 0     | 1 (1) |
| Cyclophosphamide + epirubicin + fluorouracil + zoledronic acid | 0     | 1 (1) | 0     |

|                                                  |   |       |         |
|--------------------------------------------------|---|-------|---------|
| Cyclophosphamide + methotrexate sodium           | 0 | 0     | 1 (1)   |
| Denosumab + everolimus + exemestane              | 0 | 0     | 1 (1)   |
| Docetaxel + paclitaxel                           | 0 | 0     | 1 (1)   |
| Docetaxel + zoledronic acid                      | 0 | 1 (1) | 0       |
| Enzalutamide + exemestane                        | 0 | 1 (1) | 0       |
| Epirubicin                                       | 0 | 0     | 1 (1)   |
| Epirubicin + paclitaxel                          | 0 | 0     | 1 (1)   |
| Eribulin mesilate                                | 0 | 1 (1) | 0       |
| Everolimus                                       | 0 | 1 (1) | 0       |
| Everolimus + exemestane                          | 0 | 7 (7) | 12 (12) |
| Everolimus + exemestane + non-drug: radiotherapy | 0 | 0     | 1 (1)   |
| Everolimus + fulvestrant                         | 0 | 0     | 1 (1)   |
| Exemestane + investigational drug                | 0 | 1 (1) | 0       |
| Fulvestrant + non-drug: radiotherapy             | 0 | 0     | 1 (1)   |
| Fulvestrant + palbociclib                        | 0 | 1 (1) | 1 (1)   |
| Fulvestrant + zoledronic acid                    | 0 | 1 (1) | 0       |
| Gemcitabine                                      | 0 | 0     | 1 (1)   |
| Gemcitabine hydrochloride                        | 0 | 0     | 1 (1)   |
| Letrozole                                        | 0 | 0     | 1 (1)   |

|                           |   |   |       |
|---------------------------|---|---|-------|
| Non-drug: radiotherapy    | 0 | 0 | 2 (2) |
| Protein kinase inhibitors | 0 | 0 | 1 (1) |
| Taselisib                 | 0 | 0 | 1 (1) |
| Vinorelbine               | 0 | 0 | 1 (1) |

**eTable 4. Efficacy Analysis, Per Local Investigator Review (Full Analysis Set)**

| <b>Parameter</b>                                       | <b>Everolimus + Exemestane<br/>(n = 104)</b> | <b>Everolimus<br/>(n = 103)</b> | <b>Capecitabine<br/>(n = 102)</b> |
|--------------------------------------------------------|----------------------------------------------|---------------------------------|-----------------------------------|
| <b>PFS event, No. (%)</b>                              | 80 (77)                                      | 74 (72)                         | 68 (67)                           |
| <b>Patients censored, No. (%)</b>                      | 24 (23)                                      | 29 (28)                         | 34 (33)                           |
| <b>HR<sup>a</sup> (90% CI) [95% CI]</b>                | –                                            | 0.74 (0.57-0.97) [0.54-1.02]    | 1.26 (0.96-1.66) [0.91-1.75]      |
| <b>Percentiles (90% CI) [95% CI], months</b>           |                                              |                                 |                                   |
| 25 <sup>th</sup> percentile                            | 3.9 (2.8-5.3) [2.8-5.3]                      | 4.1 (2.8-4.3) [2.7-4.3]         | 4.2 (2.8-5.6) [2.8-5.7]           |
| Median                                                 | 8.4 (6.6-9.7) [5.7-9.7]                      | 6.8 (5.5-7.2) [5.4-8.3]         | 9.6 (8.3-15.1) [7.1-16.6]         |
| 75 <sup>th</sup> percentile                            | 13.8 (11.1-17.0) [11.1-17.0]                 | 11.0 (9.6-13.7) [9.5-13.8]      | 20.9 (17.9-24.3) [17.9-29.1]      |
| <b>Kaplan-Meier estimated PFS, % (90% CI) [95% CI]</b> |                                              |                                 |                                   |
| 6 months                                               | 60 (51-67) [49-69]                           | 52 (43-60) [41-62]              | 64 (54-72) [52-73]                |
| 12 months                                              | 32 (24-41) [23-42]                           | 23 (15-31) [14-33]              | 47 (37-56) [36-58]                |
| 18 months                                              | 14 (8-21) [7-22]                             | 11 (6-19) [5-20]                | 32 (23-41) [21-43]                |
| 24 months                                              | 12 (7-19) [6-21]                             | 7 (3-13) [2-14]                 | 18 (11-27) [10-28]                |
| <b>Best overall response, No. (%)</b>                  |                                              |                                 |                                   |
| Complete response                                      | 0                                            | 0                               | 2 (2)                             |
| Partial response                                       | 21 (20)                                      | 12 (12)                         | 21 (21)                           |
| Stable disease                                         | 38 (37)                                      | 52 (50)                         | 29 (28)                           |

|                                                              |                        |                        |                        |
|--------------------------------------------------------------|------------------------|------------------------|------------------------|
| Progressive disease                                          | 12 (12)                | 11 (11)                | 7 (7)                  |
| Non-complete response/non-progressive disease <sup>b</sup>   | 27 (26)                | 20 (19)                | 31 (30)                |
| Unknown                                                      | 6 (6)                  | 8 (8)                  | 12 (12)                |
| <b>ORR,<sup>c</sup></b>                                      |                        |                        |                        |
| FAS, No. (%) [90% CI]                                        | 21 (20) [13.9-27.8]    | 12 (12) [6.9-18.2]     | 23 (23) [15.9-30.4]    |
| Patients with target lesions at baseline, No./N (%) [90% CI] | 21/74 (28) [19.9-38.2] | 12/81 (15) [8.8-22.9]  | 23/66 (35) [25.1-45.6] |
| <b>CBR,<sup>d</sup></b>                                      |                        |                        |                        |
| FAS, No. (%) [90% CI]                                        | 59 (57) [48.2-65.0]    | 43 (42) [33.5-50.3]    | 53 (52) [43.4-60.5]    |
| Patients with target lesions at baseline, No./N (%) [90% CI] | 38/74 (51) [41.2-61.4] | 32/81 (40) [30.4-49.2] | 36/66 (55) [43.7-65.1] |

Abbreviations: CBR, clinical benefit rate; CI, confidence interval; FAS, full analysis set; HR, hazard ratio; ORR, overall response rate; PFS, progression-free survival.

<sup>a</sup>HR when comparing the everolimus alone or capecitabine arm with the everolimus plus exemestane arm. Obtained from the stratified Cox model.

<sup>b</sup>Non-complete response/non-progressive disease is for response assessment of patients with only nontarget lesions.

<sup>c</sup>Overall response rate = complete response + partial response.

<sup>d</sup>Clinical benefit rate = complete response + partial response + stable disease lasting  $\geq 24$  weeks.



**eTable 5. Analysis of OS, Per Local Investigator Review (Full Analysis Set)**

| <b>Parameter</b>                                      | <b>Everolimus + Exemestane<br/>(n = 104)</b> | <b>Everolimus<br/>(n = 103)</b> | <b>Capecitabine<br/>(n = 102)</b> |
|-------------------------------------------------------|----------------------------------------------|---------------------------------|-----------------------------------|
| <b>OS event, No. (%)</b>                              | 71 (68)                                      | 59 (57)                         | 58 (57)                           |
| <b>Patients censored, No. (%)</b>                     | 33 (32)                                      | 44 (43)                         | 44 (43)                           |
| <b>HR<sup>a</sup> (90% CI) [95% CI]</b>               | –                                            | 1.27 (0.95-1.70) [0.90-1.80]    | 1.33 (0.99-1.79) [0.94-1.89]      |
| <b>Percentiles (90% CI) [95% CI], months</b>          |                                              |                                 |                                   |
| 25 <sup>th</sup> percentile                           | 10.7 (8.4-14.3) [7.8-14.5]                   | 12.0 (9.2-18.9) [8.6-19.4]      | 14.6 (11.3-20.8) [11.1-20.9]      |
| Median                                                | 23.1 (19.5-28.0) [18.9-29.5]                 | 29.3 (24.3-31.8) [23.1-35.8]    | 25.6 (23.8-33.4) [23.6-35.0]      |
| 75 <sup>th</sup> percentile                           | NE (33.0-NE) [31.8-NE]                       | 42.4 (41.6-NE) [41.6-NE]        | NE (NE-NE) [40.2-NE]              |
| <b>Kaplan-Meier estimated OS, % (90% CI) [95% CI]</b> |                                              |                                 |                                   |
| 12 months                                             | 73 (65-79) [63-80]                           | 74 (66-81) [65-82]              | 82 (75-88) [73-89]                |
| 18 months                                             | 64 (55-71) [53-72]                           | 68 (60-75) [58-76]              | 68 (60-76) [58-77]                |
| 24 months                                             | 48 (40-56) [38-58]                           | 59 (50-66) [48-68]              | 59 (50-66) [48-68]                |

Abbreviations: CI, confidence interval; HR, hazard ratio; NE, not estimable; OS, overall survival.

<sup>a</sup>HR when comparing the everolimus alone or capecitabine arm with the everolimus plus exemestane arm. Obtained from the stratified Cox model.

**eTable 6. Dose Interruptions and Reductions**

| No. (%)                                        | Everolimus + Exemestane<br>(n = 104) |            | Everolimus<br>(n = 103) | Capecitabine<br>(n = 102) |
|------------------------------------------------|--------------------------------------|------------|-------------------------|---------------------------|
|                                                | Everolimus                           | Exemestane |                         |                           |
| <b>Patients requiring dose interruption</b>    | 70 (67)                              | 29 (28)    | 56 (54)                 | 71 (70)                   |
| 1 dose interruption                            | 32 (31)                              | 22 (21)    | 26 (25)                 | 25 (25)                   |
| ≥2 dose interruptions                          | 38 (37)                              | 7 (7)      | 30 (29)                 | 46 (45)                   |
| <b>Reason for dose interruption</b>            |                                      |            |                         |                           |
| As per protocol                                | 0                                    | 0          | 1 (1)                   | 1 (1)                     |
| Adverse event                                  | 66 (63)                              | 20 (19)    | 55 (53)                 | 64 (63)                   |
| Dosing error                                   | 13 (13)                              | 8 (8)      | 8 (8)                   | 14 (14)                   |
| Scheduling conflict                            | 4 (4)                                | 1 (1)      | 0                       | 23 (23)                   |
| Dispensing error                               | 0                                    | 3 (3)      | 0                       | 2 (2)                     |
| Concomitant medication affecting drug exposure | 1 (1)                                | 1 (1)      | 0                       | 1 (1)                     |
| <b>Patients requiring dose reduction</b>       | 47 (45)                              | 0          | 41 (40)                 | 68 (67)                   |
| 1 dose reduction                               | 37 (36)                              | 0          | 35 (34)                 | 30 (29)                   |
| ≥2 dose reductions                             | 10 (10)                              | 0          | 6 (6)                   | 38 (37)                   |

| <b>Reason for dose reduction</b>            |         |   |         |         |
|---------------------------------------------|---------|---|---------|---------|
| As per protocol                             | 31 (30) | 0 | 30 (29) | 3 (3)   |
| Adverse event                               | 15 (14) | 0 | 12 (12) | 57 (56) |
| Dosing error                                | 2 (2)   | 0 | 1 (1)   | 16 (16) |
| Scheduling conflict                         | 1 (1)   | 0 | 0       | 5 (5)   |
| Dispensing error                            | 1 (1)   | 0 | 0       | 1 (1)   |
| First dose lower than planned protocol dose | 0       | 0 | 0       | 11 (11) |
| Missing                                     | 0       | 0 | 0       | 3 (3)   |

A patient with multiple occurrences of a reason for dose interruption or reduction was counted only once in that category. A patient with multiple reasons for dose interruption or reduction was counted only once in the total row.

**eTable 7. Serious Adverse Events ( $\geq 1.5\%$  Incidence in Any Arm), Regardless of Causality**

| No. (%)                               | Everolimus +            | Everolimus     | Capecitabine   |
|---------------------------------------|-------------------------|----------------|----------------|
|                                       | Exemestane<br>(n = 104) | (n = 103)      | (n = 102)      |
| <b>Any preferred term</b>             | <b>37 (36)</b>          | <b>30 (29)</b> | <b>30 (29)</b> |
| Pneumonia                             | 8 (8)                   | 4 (4)          | 2 (2)          |
| General physical health deterioration | 4 (4)                   | 0              | 0              |
| Acute kidney injury                   | 3 (3)                   | 4 (4)          | 2 (2)          |
| Urinary tract infection               | 3 (3)                   | 1 (1)          | 1 (1)          |
| Acute respiratory failure             | 2 (2)                   | 0              | 0              |
| Dyspnea                               | 2 (2)                   | 2 (2)          | 1 (1)          |
| Hepatic failure                       | 2 (2)                   | 1 (1)          | 0              |
| Nausea                                | 2 (2)                   | 0              | 0              |
| Pneumonitis                           | 2 (2)                   | 3 (3)          | 0              |
| Pulmonary embolism                    | 2 (2)                   | 1 (1)          | 2 (2)          |
| Syncope                               | 2 (2)                   | 1 (1)          | 0              |
| Vomiting                              | 2 (2)                   | 1 (1)          | 3 (3)          |
| Abdominal pain                        | 1 (1)                   | 0              | 2 (2)          |
| Anemia                                | 1 (1)                   | 3 (3)          | 1 (1)          |
| Cancer pain                           | 1 (1)                   | 2 (2)          | 0              |
| Dehydration                           | 1 (1)                   | 1 (1)          | 3 (3)          |
| Diarrhea                              | 1 (1)                   | 2 (2)          | 3 (3)          |
| Fatigue                               | 1 (1)                   | 0              | 2 (2)          |
| Pleural effusion                      | 1 (1)                   | 1 (1)          | 2 (2)          |
| Respiratory failure                   | 1 (1)                   | 3 (3)          | 1 (1)          |
| Deep vein thrombosis                  | 0                       | 0              | 4 (4)          |
| Hypokalemia                           | 0                       | 1 (1)          | 2 (2)          |
| Hypotension                           | 0                       | 0              | 3 (3)          |

|            |   |       |       |
|------------|---|-------|-------|
| Stomatitis | 0 | 2 (2) | 1 (1) |
|------------|---|-------|-------|

**eTable 8. Adverse Events Leading to Treatment Discontinuation ( $\geq 1.5\%$  Incidence in Any Arm), Regardless of Causality**

| No. (%)                                    | Everolimus +<br>Exemestane<br>(n = 104) | Everolimus<br>(n = 103) | Capecitabine<br>(n = 102) |
|--------------------------------------------|-----------------------------------------|-------------------------|---------------------------|
| <b>Any preferred term</b>                  | <b>18 (17)</b>                          | <b>20 (19)</b>          | <b>21 (21)</b>            |
| Pneumonitis                                | 3 (3)                                   | 5 (5)                   | 0                         |
| Stomatitis                                 | 2 (2)                                   | 3 (3)                   | 3 (3)                     |
| Acute kidney injury                        | 1 (1)                                   | 3 (3)                   | 1 (1)                     |
| Blood creatinine increased                 | 1 (1)                                   | 2 (2)                   | 0                         |
| Vomiting                                   | 1 (1)                                   | 1 (1)                   | 3 (3)                     |
| Diarrhea                                   | 0                                       | 1 (1)                   | 4 (4)                     |
| Hyperglycemia                              | 0                                       | 2 (2)                   | 0                         |
| Nausea                                     | 0                                       | 2 (2)                   | 1 (1)                     |
| Palmar-plantar erythrodysesthesia syndrome | 0                                       | 0                       | 5 (5)                     |

**eTable 9. Summary of Deaths**

| No. (%)                                           | Everolimus +            | Everolimus         | Capecitabine |
|---------------------------------------------------|-------------------------|--------------------|--------------|
|                                                   | Exemestane<br>(n = 104) |                    |              |
| <b>All deaths (including on-treatment deaths)</b> | 71 (68)                 | 59 (57)            | 58 (57)      |
| Disease progression                               | 67 (64)                 | 53 (51)            | 53 (52)      |
| Cardiac arrest                                    | 1 (1)                   | 0                  | 0            |
| Cardiac failure acute                             | 1 (1)                   | 0                  | 0            |
| Cardio-respiratory arrest                         | 0                       | 1 (1)              | 0            |
| Death                                             | 1 (1) <sup>a</sup>      | 1 (1) <sup>b</sup> | 0            |
| Lung infection                                    | 0                       | 0                  | 1 (1)        |
| Septic shock                                      | 0                       | 1 (1)              | 1 (1)        |
| Metastases to liver                               | 0                       | 1 (1)              | 0            |
| Cerebrovascular accident                          | 0                       | 0                  | 1 (1)        |
| Acute kidney injury                               | 0                       | 1 (1)              | 0            |
| Pneumonia aspiration                              | 1 (1)                   | 0                  | 0            |
| Lung disorder                                     | 0                       | 0                  | 1 (1)        |
| Respiratory failure                               | 0                       | 1 (1)              | 1 (1)        |
| <b>On-treatment deaths</b>                        | 9 (9)                   | 5 (5)              | 2 (2)        |
| Disease progression                               | 6 (6)                   | 2 (2)              | 0            |
| Cardiac arrest                                    | 1 (1)                   | 0                  | 0            |
| Cardiac failure acute                             | 1 (1)                   | 0                  | 0            |
| Death                                             | 1 (1) <sup>a</sup>      | 0                  | 0            |
| Acute kidney injury                               | 0                       | 1 (1)              | 0            |
| Cardio-respiratory arrest                         | 0                       | 1 (1)              | 0            |
| Cerebrovascular accident                          | 0                       | 0                  | 1 (1.0)      |
| Respiratory failure                               | 0                       | 1 (1)              | 0            |
| Septic shock                                      | 0                       | 0                  | 1 (1.0)      |

On-treatment deaths are deaths that occurred up to 30 days after treatment discontinuation.

<sup>a</sup> Death occurred after a fall; <sup>b</sup> Cause of death unknown (occurred off-treatment).

## eReferences

1. Baselga J, Campone M, Piccart M, et al. Everolimus in postmenopausal hormone-receptor-positive advanced breast cancer. *N Engl J Med*. 2012;366(6):520-529.
3. Ellard SL, Clemons M, Gelmon KA, et al. Randomized phase II study comparing two schedules of everolimus in patients with recurrent/metastatic breast cancer: NCIC clinical trials group IND.163. *J Clin Oncol*. 2009;27(27):4536-4541.
3. Harbeck N, Saupé S, Jäger E, et al. A randomized phase III study evaluating pegylated liposomal doxorubicin versus capecitabine as first-line therapy for metastatic breast cancer: results of the PELICAN study. *Breast Cancer Res Treat*. 2017;161(1):63-72.
4. Jennison C, Turnbull BW, (1999) Group Sequential Methods: Applications to Clinical Trials. (Book)
5. Kaufmann M, Maass N, Costa SD, et al. First-line therapy with moderate dose capecitabine in metastatic breast cancer is safe and active: results of the MONICA trial. *Eur J Cancer*. 2010;46(18):3184-3191.
6. O'Shaughnessy JA, Kaufmann M, Siedentopf F, et al. Capecitabine monotherapy: review of studies in first-line HER-2-negative metastatic breast cancer. *Oncologist*. 2012;17(4):476-484.
7. Robert NJ, Dieras V, Glaspy J, et al. RIBBON-1: Randomized, double-blind, placebo-controlled, phase III trial of chemotherapy with or without bevacizumab for first-line treatment of human epidermal growth factor receptor 2-negative, locally recurrent or metastatic breast cancer. *J Clin Oncol*. 2011;29(10):1252-1260.
8. Stockler MR, Harvey VJ, Francis PA, et al. Capecitabine versus classical cyclophosphamide, methotrexate, and fluorouracil as first-line chemotherapy for advanced breast cancer. *J Clin Oncol*. 2011;29(34):4498-4504.
